# Supplementary material
Source: PubMed Central journal article supplement (PMC6660358)
Supplement: NIHMS1530054-supplement-2.pdf [file NIHMS1530054-supplement-2.pdf]

**Supplementary Table 1. Demographic Information for TREM2<sup>R47H</sup>, TREM2<sup>R62H</sup>, and TREM2<sup>CV</sup> AD cases used in IHC analysis**

| TREM2 Genotype | ApoE genotype | Sex | CDRe | Age  | Braak |
|----------------|---------------|-----|------|------|-------|
| R47H           | 34            | M   | 3    | 78.2 | V     |
| R47H           | 33            | F   | 3    | 94   | N/A   |
| R47H           | 44            | M   | 3    | 74.8 | V     |
| R62H           | 34            | M   | 3    | 77.7 | V     |
| R47H           | 33            | M   | 3    | 90.6 | V     |
| R62H           | 34            | M   | 3    | 89.3 | VI    |
| R62H           | 44            | F   | 3    | 89.4 | N/A   |
| R62H           | 34            | F   | 3    | 79   | N/A   |
| R47H           | 34            | F   | 3    | 88.2 | IV    |
| R47H           | 33            | M   | 3    | 85.6 | V     |
| R62H           | 33            | M   | 2    | 94.4 | II    |
| R62H           | 33            | F   | 3    | 84.4 | VI    |
| R62H           | 44            | F   | 3    | 72.3 | V     |
| R47H           | N/A           | F   | N/A  | 87   | VI    |
| R47H           | N/A           | M   | N/A  | 74   | VI    |
| CV             | 44            | M   | 3    | 72.2 | VI    |
| CV             | 33            | F   | 3    | 95.7 | VI    |
| CV             | 44            | M   | 3    | 71.6 | VI    |
| CV             | 34            | M   | 3    | 79.7 | V     |
| CV             | 33            | M   | 1    | 91.1 | V     |
| CV             | 24            | F   | 3    | 88.8 | VI    |
| CV             | 34            | F   | 3    | 81.3 | VI    |
| CV             | 34            | F   | 3    | 84.5 | V     |
| CV             | 33            | M   | 3    | 81   | VI    |
| CV             | 33            | M   | 1    | 91.2 | III   |
| CV             | 33            | F   | 2    | 90.3 | VI    |
| CV             | 34            | F   | 2    | 78.1 | VI    |
| CV             | N/A           | M   | N/A  | 86   | VI    |
| CV             | N/A           | F   | N/A  | 74   | VI    |

**Supplementary Table 2. Demographic information for TREM2<sup>R47H</sup>, TREM2<sup>R62H</sup>, and TREM2<sup>CV</sup> AD cases used in biochemical analysis**

| TREM2 Genotype | ApoE genotype | Sex | CDRe | Age  | Braak |
|----------------|---------------|-----|------|------|-------|
| R47H           | 34            | M   | 3    | 78.2 | V     |
| R47H           | 33            | M   | 3    | 90.6 | V     |
| R62H           | 34            | M   | 3    | 89.3 | VI    |
| R62H           | 34            | F   | 3    | 79   | N/A   |
| R47H           | 34            | F   | 3    | 88.2 | IV    |
| R47H           | 33            | M   | 3    | 85.6 | V     |
| R62H           | 33            | M   | 2    | 94.4 | II    |
| R62H           | 33            | F   | 3    | 84.4 | VI    |
| R62H           | 44            | F   | 3    | 72.3 | V     |
| R47H           | N/A           | F   | N/A  | 87   | VI    |
| R47H           | N/A           | M   | N/A  | 74   | VI    |
| R62H           | 33            | F   | 3    | 89.2 | N/A   |
| R62H           | 24            | F   | 3    | 89.6 | N/A   |
| R47H           | 34            | M   | 3    | 83.8 | N/A   |
| CV             | 44            | M   | 3    | 72.2 | VI    |
| CV             | 33            | F   | 3    | 95.7 | VI    |
| CV             | 44            | M   | 3    | 71.6 | VI    |
| CV             | 34            | M   | 3    | 79.7 | V     |
| CV             | 33            | M   | 1    | 91.1 | V     |
| CV             | 33            | M   | 3    | 81   | VI    |
| CV             | 33            | M   | 1    | 91.2 | III   |
| CV             | 34            | F   | 2    | 78.1 | VI    |
| CV             | N/A           | M   | N/A  | 86   | VI    |
| CV             | N/A           | F   | N/A  | 74   | VI    |
| CV             | 34            | F   | N/A  | 85.4 | N/A   |
